# Supplementary material for: Specific motifs mediate post-synaptic and surface transport of G protein-coupled receptors
Source: PubMed Central journal article supplement — iScience. 2021 Dec 18;25(1):103643. doi: 10.1016/j.isci.2021.103643 (PMC8728401; doi:10.1016/j.isci.2021.103643), 2021-12-18
Supplement: mmc1.pdf [file mmc1.pdf]

iScience, Volume 25

**Supplemental information**

**Specific motifs mediate  
post-synaptic and surface transport  
of G protein-coupled receptors**

Xin Xu, Zhe Wei, and Guangyu Wu

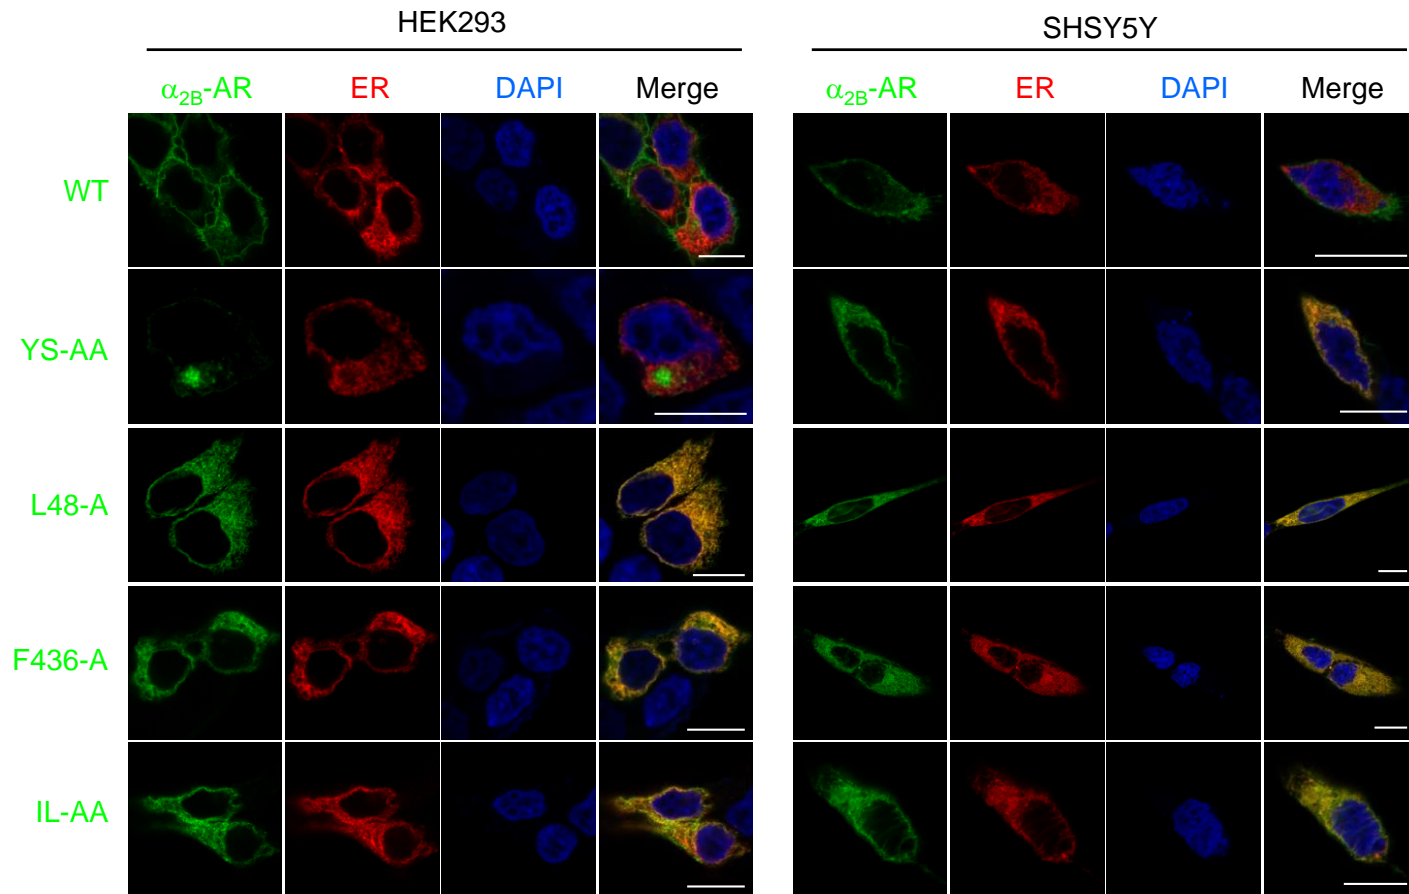

**Figure S1. Colocalization of  $\alpha_{2B}$ -AR and its mutants with the ER marker DsRed-ER in different cell types.** Related to Figure 3. HEK293 and SHSY5Y cells were cultured and transfected with GFP-tagged  $\alpha_{2B}$ -AR together with the DsRed-ER plasmids. Colocalization of  $\alpha_{2B}$ -AR with DsRed-ER was revealed by confocal microscopy. The images shown are representatives of 2 experiments. Scale bars, 10  $\mu$ m.

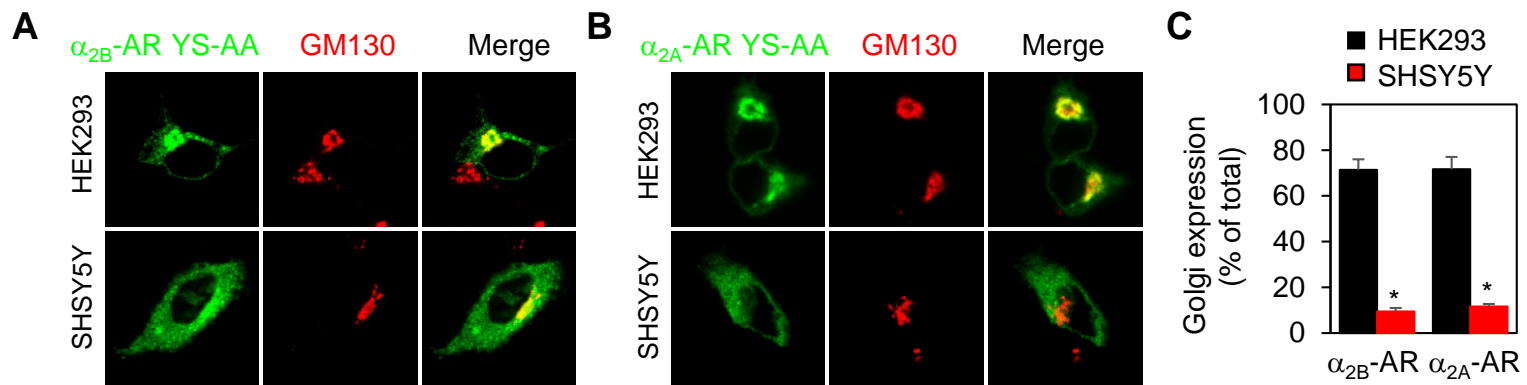

**Figure S2. The subcellular distribution of YS-AA mutants of  $\alpha_2$ -ARs in different cell types.** Related to Figure 3.  
 (A) Colocalization of the YS-AA mutant of  $\alpha_{2B}$ -AR with GM130 in HEK293 and SHSY5Y cells. Scale bar, 10  $\mu$ m.  
 (B) Colocalization of the YS-AA mutant of  $\alpha_{2A}$ -AR with GM130 in HEK293 and SHSY5Y cells. Scale bar, 10  $\mu$ m.  
 (C) Quantitative data shown in (A) and (B). The data are expressed as percentages of total expression with a total of at least 20 cells quantified in each experiment. Bars represent mean  $\pm$  SE (n = 3). Unpaired Student's t test; \*p < 0.001 versus HEK293 cells.

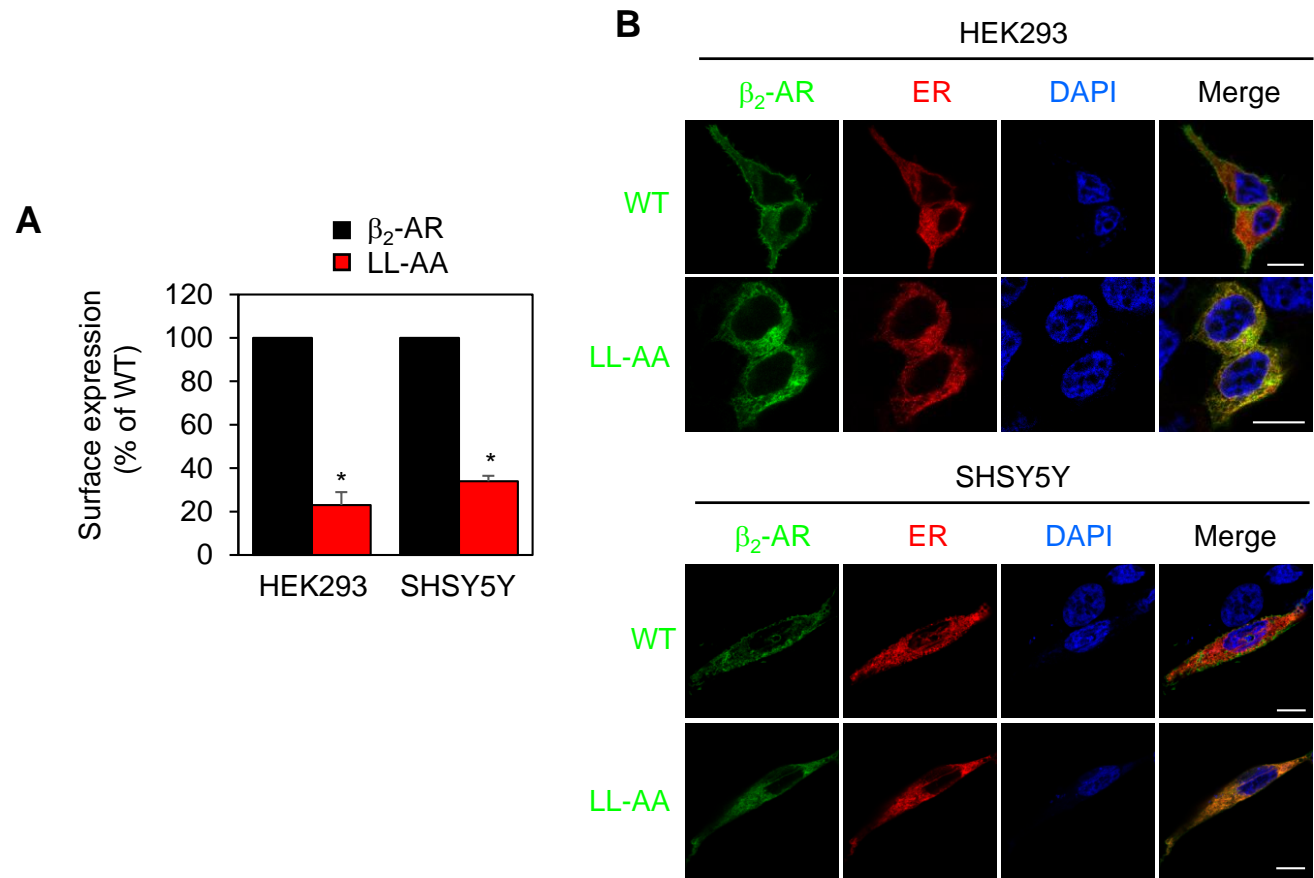

**Figure S3. Trafficking function of the LL motif of  $\beta_2$ -AR in HEK293 and SHSY5Y cells.** Related to Figure 3.  
 (A) Surface expression of  $\beta_2$ -AR or its LL-AA mutant measured by radioligand binding of intact live cells, The data are expressed as percentages of WT. Bars represent mean  $\pm$  SE (n = 3-6). Unpaired Student's t test; \*p < 0.001 versus WT.  
 (B) Colocalization of  $\beta_2$ -AR or its LL-AA with the ER marker DsRed-ER revealed by confocal microscopy. The images shown are representatives of 2 experiments. Scale bars, 10  $\mu$ m.

**Table S1. Primers used to clone mutants into the pEGFP-N1 vector by mutagenesis. Related to Figures 4-6.**

| Mutants                                                | Sense (S) or antisense (A) | Sequences                                                   |
|--------------------------------------------------------|----------------------------|-------------------------------------------------------------|
| VSVG DxE-AxA<br>VSVGct DxE-AxA<br>VSVGct DxE-AxA/LL-AA | S                          | AGAAAAGACAGATTTATACAGCCATAGCGATGAACCGACTTGGA<br>AACAG       |
|                                                        | A                          | CTGTTTCCAAGTCGGTTCATCGCTATGGCTGTATAAATCTGTCT<br>TTTCT       |
| VSVGct LL-AA                                           | S                          | GAAATTTAAAAAGTACTTCCTCCAGGCCGCGAAATATATTCCCC<br>GGGATCCAATG |
|                                                        | A                          | CATTGGATCCCGGGGAATATATTTTCGCGCCTGGAGGAAGTACT<br>TTTTAAATTC  |
| $\beta_2$ AR $\alpha$ 2ct IL-AA                        | S                          | CCGTGCCTTTCGAAGGCCGCTTGCCGGCCGTGGACC                        |
|                                                        | A                          | GGTCCACGGCCGCAAGCGGCCCTTCGAAAGGCACGG                        |
| M3R LL-AA                                              | S                          | CATTCAGAACCACTTTCAAGATGGCGGCGCTGTGCCAGTGTGAC<br>AAAAAAA     |
|                                                        | A                          | TTTTTTTGTCCACTGGCACAGCGCCGCCATCTTGAAAAGTGGTT<br>CTGAATG     |
